# Supplementary material
Source: publisher figshare collection journal article supplement (https://wiley.figshare.com/articles/dataset/_/3566502)
Supplement: Supplementary file 1 [file 1 › appendix-E.htm]

Ecological Archives M078-021-A5


### *Ecological Archives* M078-021-A5

### **Nikolay Strigul, Denis Pristinski, Drew Purves, Jonathan Dushoff, and Stephen Pacala. 2008. Scaling from trees to forests: tractable macroscopic equations for forest dynamics. *Ecological Monographs* 78:523–545.**

Appendix E. Flat-top model: stability of the single-species stationary state given by (24) and (26) in the text. Click here for a PDF file of the appendix.

---


[Back to M078-021]
